# Supplementary material for: A density functional theory study of the water–gas shift reaction catalyzed by a Cr(CO)6 complex
Source: Royal Society of Chemistry journal article supplement (doi:10.1039/d4nj03139c), 2024-01-01
Supplement: d4nj03139c1.pdf [file d4nj03139c1.pdf]

**S1.** Comparison of Cr(CO)<sub>6</sub> bond lengths with different basis groups, in Å.

| Basis groups                | r(C–Cr)/Å    | r(C–O)/Å     |
|-----------------------------|--------------|--------------|
| Experimental                | <b>1.914</b> | <b>1.141</b> |
| B3LYP/6-311G++(2d,p)        | 1.928        | 1.140        |
| MPW1PW91/6-311G++(2d,p)     | 1.903        | 1.136        |
| PBEPBE/6-311G++(2d,p)       | 1.906        | 1.153        |
| HSHE1PBE/6-311G++(2d,p)     | 1.905        | 1.145        |
| B3LYP/6-311G++(2d,p)-pfd    | 1.916        | 1.139        |
| B3LYP/6-311G++(2d,p)-gd2    | 1.929        | 1.139        |
| B3LYP/6-311G++(2d,p)-gd3bj  | 1.922        | 1.139        |
| B3LYP/6-311G++(2d,p)-gd3    | 1.928        | 1.140        |
| PBEPBE/6-311G++(2d,p)-gd2   | 1.907        | 1.153        |
| PBEPBE/6-311G++(2d,p)-gd3   | 1.906        | 1.153        |
| PBEPBE/6-311G++(2d,p)-gd3bj | 1.903        | 1.153        |
| PBEPBE/6-311G++(2d,p)-pfd   | 1.895        | 1.152        |
| HSHE1PBE/6-311G++(2d,p)-pfd | 1.893        | 1.136        |

**S2.** Specific details of CO, H<sub>2</sub>O, H<sub>2</sub>, CO<sub>2</sub> heat capacities and entropy calculations, in cal/(mol·K).

|               | CO    |        | H <sub>2</sub> O |        | H <sub>2</sub> |        | CO <sub>2</sub> |        |
|---------------|-------|--------|------------------|--------|----------------|--------|-----------------|--------|
|               | Cv    | S      | Cv               | S      | Cv             | S      | Cv              | S      |
| Total         | 4.973 | 47.193 | 6.011            | 45.091 | 4.968          | 31.140 | 6.836           | 51.035 |
| Electronic    | 0.000 | 0.000  | 0.000            | 0.000  | 0.000          | 0.000  | 0.000           | 0.000  |
| Translational | 2.981 | 35.923 | 2.981            | 34.608 | 2.981          | 28.080 | 2.981           | 37.270 |
| Rotational    | 1.987 | 11.269 | 2.981            | 10.476 | 1.987          | 3.059  | 1.987           | 13.075 |
| Vibrational   | 0.005 | 0.001  | 0.049            | 0.007  | 0.000          | 0.000  | 1.868           | 0.690  |

**S3.** Plot of scan of total energy variation for relaxed scanning step I, in kcal/mol.

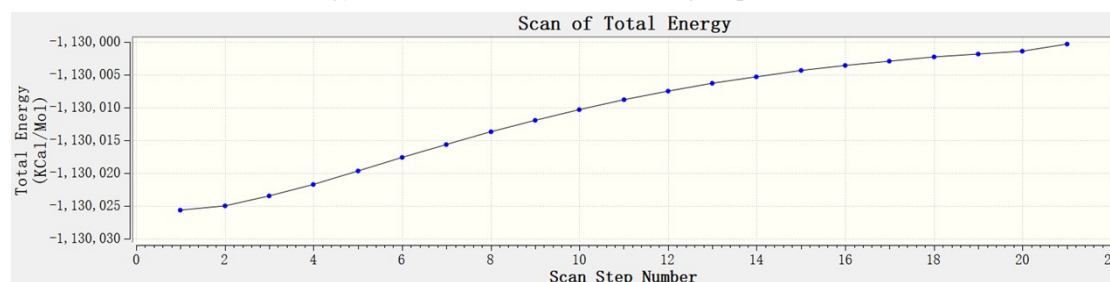

S4. IRC analysis was used to verify that the reactants and products of TS2b-3 point to intermediate 2b and intermediate 3, respectively, (a) Total Energy along IRC, (b) Structural diagram of the reactants of structure TS2b-3, and (c) Structural diagram of the products of structure TS2b-3.

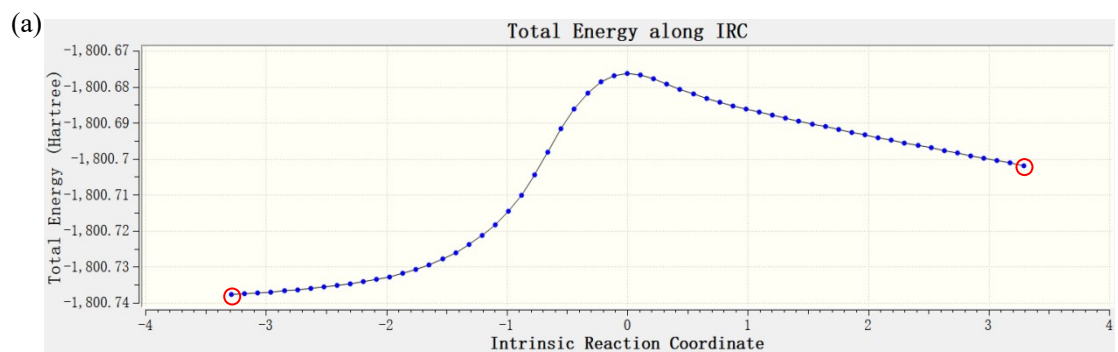

(b) (c)

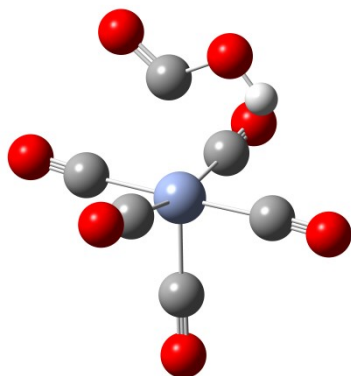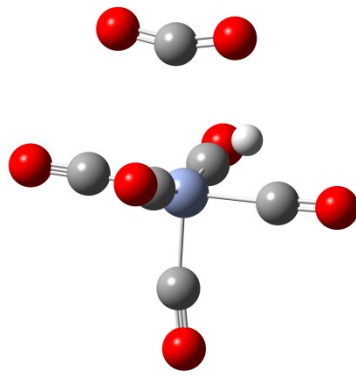

**S5.** All possible TDI, TDTS, and their Gibbs free energy values and  $\delta E$  in the catalytic process, in kcal/mol.

| Type    | TDTS     | $G_{\text{TDTS}}$ | TDI    | $G_{\text{TDI}}$ | $\delta E$ |      |
|---------|----------|-------------------|--------|------------------|------------|------|
| gaseous | TS 2a-2b | -40.90            | 2a     | -49.87           | 8.97       |      |
|         |          |                   | 3      | -58.82           | 5.79       |      |
|         | TS 2b-3  | -13.41            | 2a     | -49.87           | 36.46      |      |
|         |          |                   | 3      | -58.82           | 33.28      |      |
|         | TS 3-4   | -24.41            | 3      | -58.82           | 34.41      |      |
|         |          |                   | 5      | -42.91           | 6.37       |      |
|         | TS 5-2a  | -37.40            | 3      | -58.82           | 21.42      |      |
|         |          |                   | 2a     | -49.87           | 12.47      |      |
|         | aqueous  | TS 2a-2b          | -89.95 | 2a               | -98.17     | 8.22 |
|         |          |                   |        | 3                | -107.27    | 8.74 |
| TS 2b-3 |          | -61.59            | 2a     | -98.17           | 36.58      |      |
|         |          |                   | 3      | -107.27          | 37.10      |      |
| TS 3-4  |          | -69.86            | 3      | -107.27          | 28.83      |      |
|         |          |                   | 5      | -89.86           | 11.42      |      |
| TS 5-2a |          | -82.22            | 3      | -107.27          | 25.05      |      |
|         |          |                   | 2a     | -98.17           | 15.95      |      |

**S6.** The Gibbs free energy of the transition states and intermediates in the reaction pathway at temperatures ranging from 300K to 900K, in kcal/mol.

| Temperature | Type    | 1+OH <sup>-</sup><br>+CO+H <sub>2</sub> O | 2a+CO+<br>H <sub>2</sub> O | TS(2a+2b)<br>+CO+H <sub>2</sub> O | 2b+CO<br>+H <sub>2</sub> O | TS(2b-3)<br>+CO+H <sub>2</sub> O | 3+H <sub>2</sub> O+<br>CO+CO <sub>2</sub> | TS (3-4)<br>+CO+CO <sub>2</sub> | 4+CO+<br>CO <sub>2</sub> | 5+CO+CO <sub>2</sub><br>+H <sub>2</sub> | TS(5-2a)<br>+H <sub>2</sub> +CO <sub>2</sub> | 2a+H <sub>2</sub> +<br>CO <sub>2</sub> |
|-------------|---------|-------------------------------------------|----------------------------|-----------------------------------|----------------------------|----------------------------------|-------------------------------------------|---------------------------------|--------------------------|-----------------------------------------|----------------------------------------------|----------------------------------------|
| 300K        | gaseous | 0.00                                      | -53.03                     | -44.08                            | -52.80                     | -16.57                           | -57.98                                    | -27.56                          | -41.68                   | -42.91                                  | -40.57                                       | -65.13                                 |
|             | aqueous | 0.00                                      | -14.60                     | -6.34                             | -13.22                     | 22.03                            | -20.12                                    | 13.71                           | -2.44                    | -3.09                                   | 1.37                                         | -23.16                                 |
| 400K        | gaseous | -23.71                                    | -72.59                     | -64.19                            | -72.96                     | -36.55                           | -80.26                                    | -47.40                          | -61.66                   | -64.41                                  | -60.20                                       | -83.70                                 |
|             | aqueous | -22.21                                    | -34.21                     | -26.45                            | -32.67                     | 2.12                             | -42.57                                    | -6.26                           | -22.70                   | -24.74                                  | -18.11                                       | -41.78                                 |
| 500K        | gaseous | -49.34                                    | -93.98                     | -86.16                            | -95.01                     | -58.40                           | -104.37                                   | -69.07                          | -83.51                   | -87.78                                  | -81.74                                       | -104.14                                |
|             | aqueous | -46.35                                    | -55.66                     | -48.42                            | -53.96                     | -19.65                           | -66.86                                    | -28.10                          | -44.81                   | -48.26                                  | -39.49                                       | -62.28                                 |
| 600K        | gaseous | -76.58                                    | -116.94                    | -109.70                           | -118.66                    | -81.84                           | -130.03                                   | -92.32                          | -106.95                  | -112.75                                 | -104.89                                      | -126.18                                |
|             | aqueous | -72.08                                    | -78.67                     | -71.98                            | -76.81                     | -43.03                           | -92.70                                    | -51.53                          | -68.54                   | -73.39                                  | -62.50                                       | -84.38                                 |

---

|      |         |         |         |         |         |         |         |         |         |         |         |         |
|------|---------|---------|---------|---------|---------|---------|---------|---------|---------|---------|---------|---------|
| 700K | gaseous | -105.20 | -141.26 | -134.62 | -143.71 | -106.67 | -157.04 | -116.96 | -131.81 | -139.11 | -129.46 | -149.62 |
|      | aqueous | -99.20  | -103.05 | -96.91  | -101.03 | -67.79  | -119.91 | -76.36  | -93.68  | -99.92  | -86.93  | -107.89 |
| 800K | gaseous | -135.03 | -166.78 | -160.75 | -169.99 | -132.73 | -185.26 | -142.83 | -157.92 | -166.71 | -155.27 | -174.31 |
|      | aqueous | -127.54 | -128.65 | -123.06 | -126.46 | -93.79  | -148.32 | -102.43 | -120.07 | -127.68 | -112.60 | -132.65 |
| 900K | gaseous | -165.97 | -193.40 | -187.98 | -197.40 | -159.91 | -214.57 | -169.83 | -185.16 | -195.42 | -182.22 | -200.12 |
|      | aqueous | -156.98 | -155.34 | -150.32 | -152.98 | -120.90 | -177.82 | -129.63 | -147.60 | -156.56 | -139.41 | -158.54 |

---
